# Supplementary material for: Polyimide-based graphene composite foams with hierarchical impedance gradient for efficient electromagnetic absorption
Source: Royal Society of Chemistry journal article supplement (doi:10.1039/d0tc04951d), 2020-12-22
Supplement: d0tc04951d1.pdf [file d0tc04951d1.pdf]

## Electronic supplementary information

### **Polyimide-based graphene composite foams with hierarchical impedance gradient for efficient electromagnetic absorption**

Lei Pu<sup>a</sup>, Shuangshuang Li<sup>a</sup>, Yawei Zhang<sup>a</sup>, Haiyan Zhu<sup>a</sup>, Wei Fan<sup>b</sup>, Piming Ma<sup>a</sup>, Weifu Dong<sup>a</sup>, Zicheng Wang<sup>a, \*</sup>, Tianxi Liu<sup>a, \*</sup>

<sup>a</sup> *The Key Laboratory of Synthetic and Biological Colloids, Ministry of Education, Institute of Nanocomposites and Energy Materials, School of Chemical and Material Engineering, Jiangnan University, 214122 Wuxi, Jiangsu, P. R. China*

<sup>b</sup> *State Key Laboratory for Modification of Chemical Fibers and Polymer Materials, College of Materials Science and Engineering, Donghua University, Shanghai 201620, P. R. China*

\* Corresponding authors.

E-mail addresses: txliu@jiangnan.edu.cn (T. X. Liu);

wangzc@jiangnan.edu.cn (Z. C. Wang)

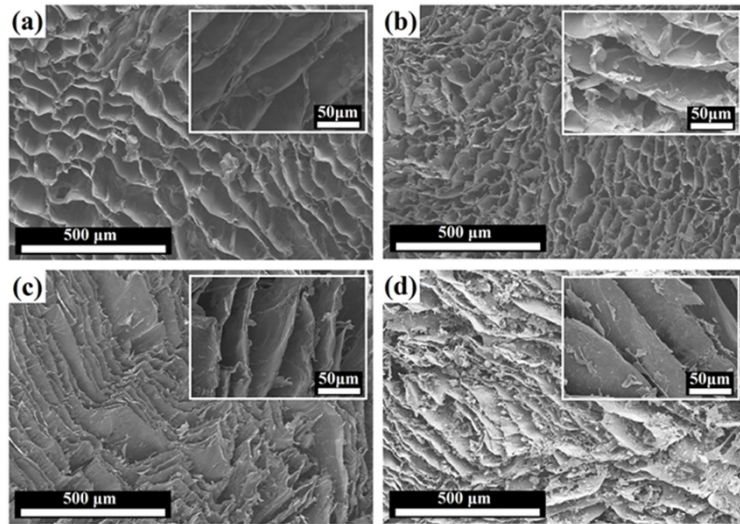

**Fig. S1** SEM images of polyimide-based graphene composite foams: (a) PI-PI; (b) PI-rGO; (c) PI-PI-rGO and (d) PI-rGO-rGO.

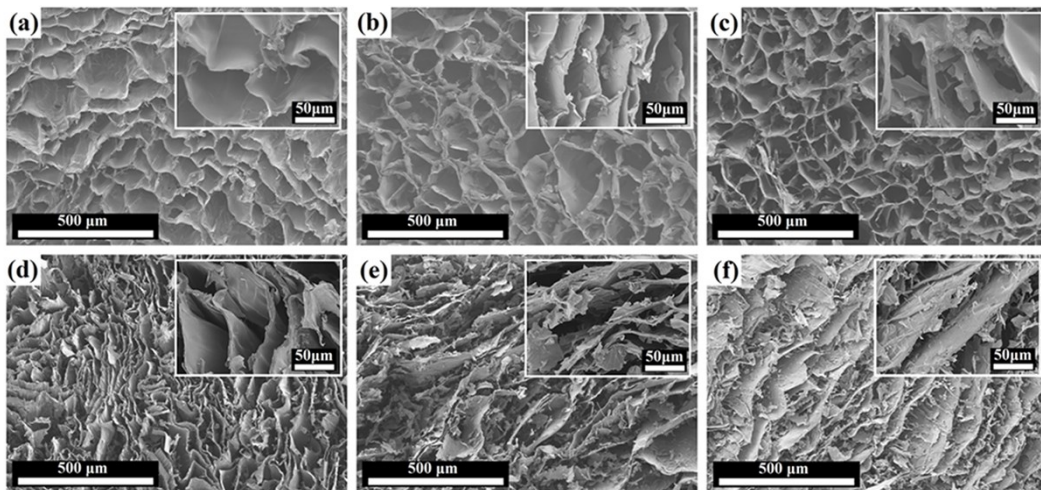

**Fig. S2** SEM images of composite foams loaded with rGO/PI<sub>x</sub> at different concentration ratios: (a) PI-GP<sub>1/3</sub>; (b) PI-GP<sub>1/2</sub>; (c) PI-GP<sub>2/3</sub>; (d) PI-GP<sub>1/3</sub>-rGO; (e) PI-GP<sub>1/2</sub>-rGO and (f) PI-GP<sub>2/3</sub>-rGO.

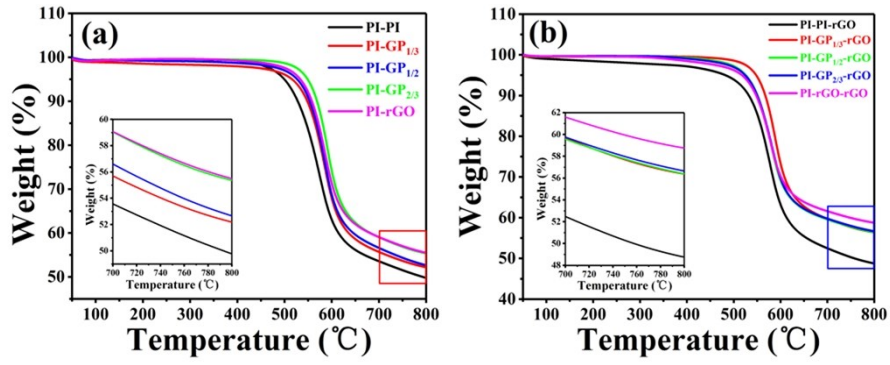

**Fig. S3** TGA curves of (a) bi-layer composite foams: PI-PI, PI-GP<sub>x</sub>, PI-rGO; (b) tri-layer composite foams: PI-PI-rGO, PI-GP<sub>x</sub>-rGO, PI-rGO-rGO ( $x = 1/3, 1/2, 2/3$ ).

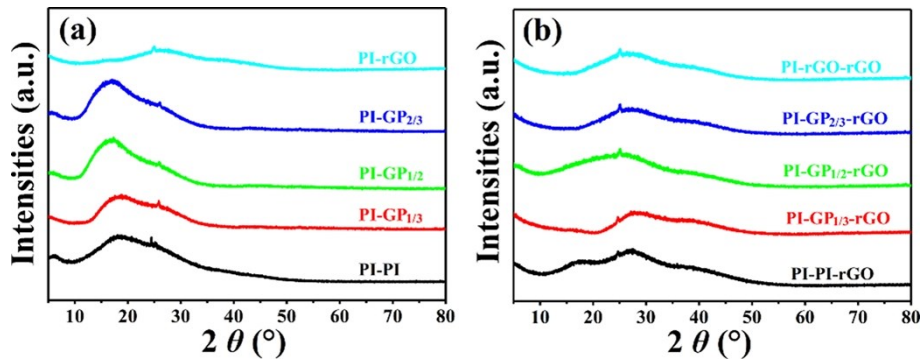

**Fig. S4** XRD curves of (a) bi-layer composite foams: PI-PI, PI-GP<sub>x</sub>, PI-rGO; (b) tri-layer composite foams: PI-PI-rGO, PI-GP<sub>x</sub>-rGO, PI-rGO-rGO ( $x = 1/3, 1/2, 2/3$ ).

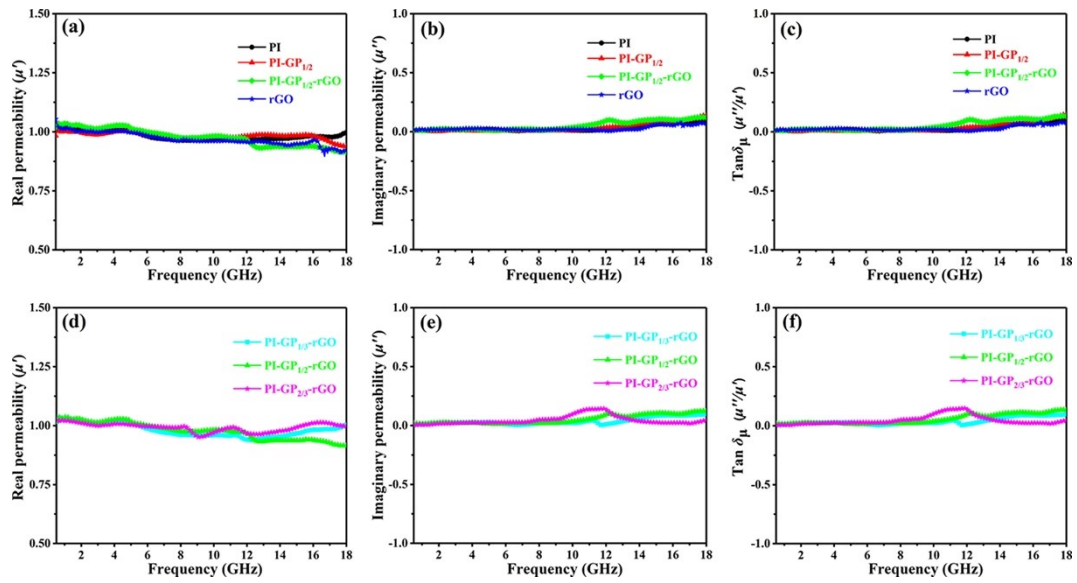

**Fig. S5** The electromagnetic parameters of the composite foams: (a) (d) the real parts of complex permeability; (b) (e) the imaginary parts of complex permeability; (c) (f) permeability tangent of the composite foams.

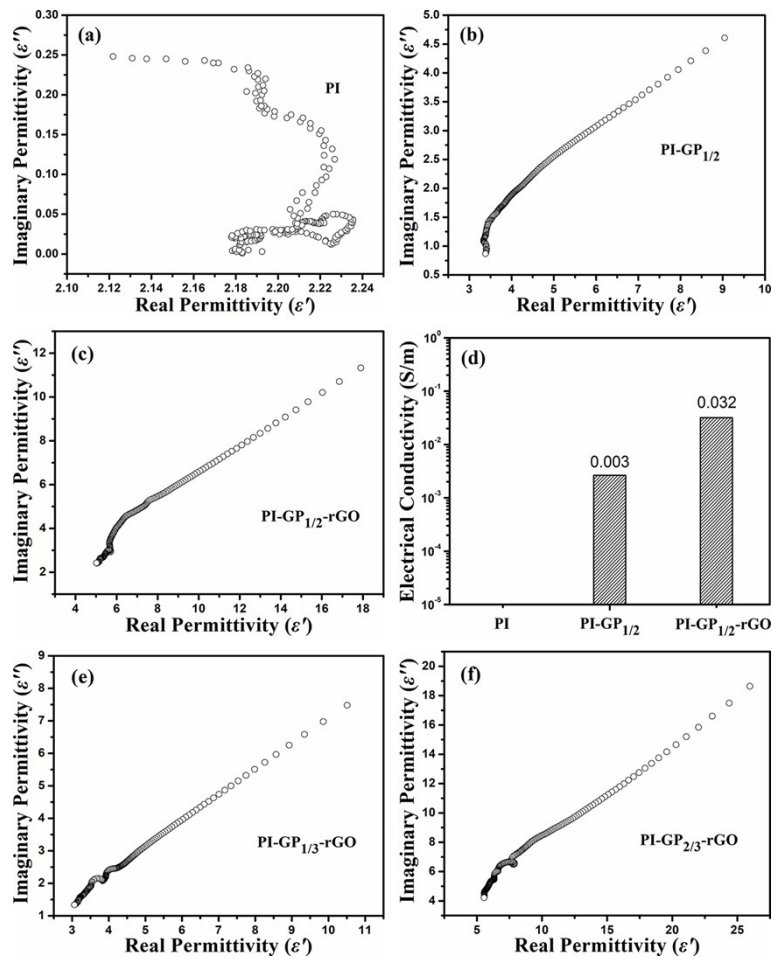

**Fig. S6** The Cole-Cole semicircle curves (a: PI; b: PI-GP<sub>1/2</sub>; c: PI-GP<sub>1/2</sub>-rGO; e: PI-GP<sub>1/3</sub>-rGO; f: PI-GP<sub>2/3</sub>-rGO) and (d) electrical conductivity of polyimide-based graphene composite foams with different hierarchical structures.

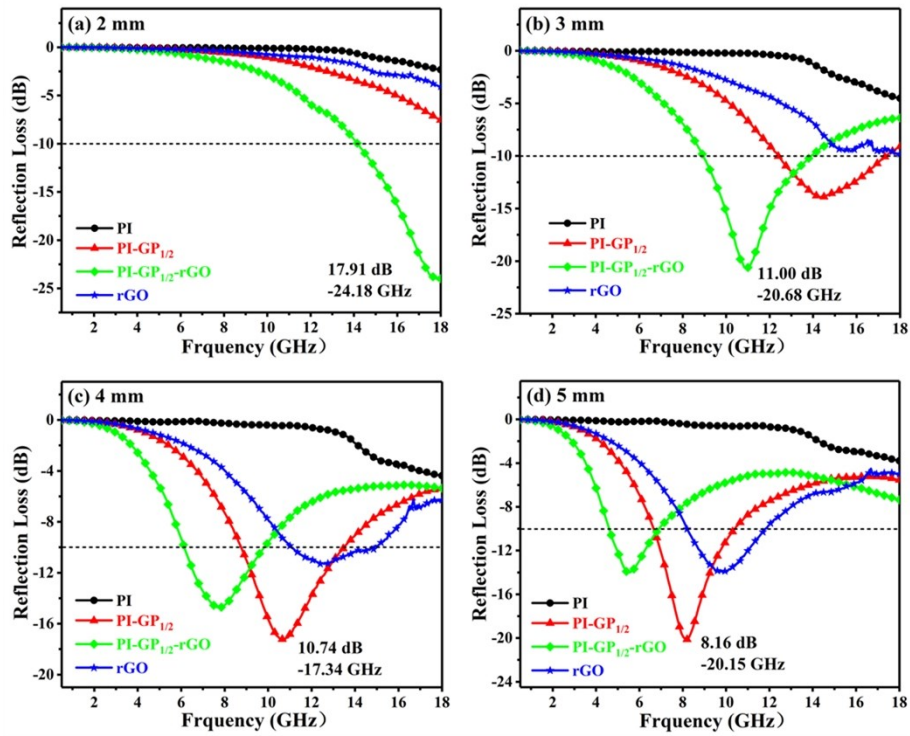

**Fig. S7** Reflection loss of PI, PI-GP<sub>1/2</sub>, PI-GP<sub>1/2</sub>-rGO and rGO at different thicknesses: (a) 2 mm; (b) 3 mm; (c) 4 mm; (d) 5 mm.

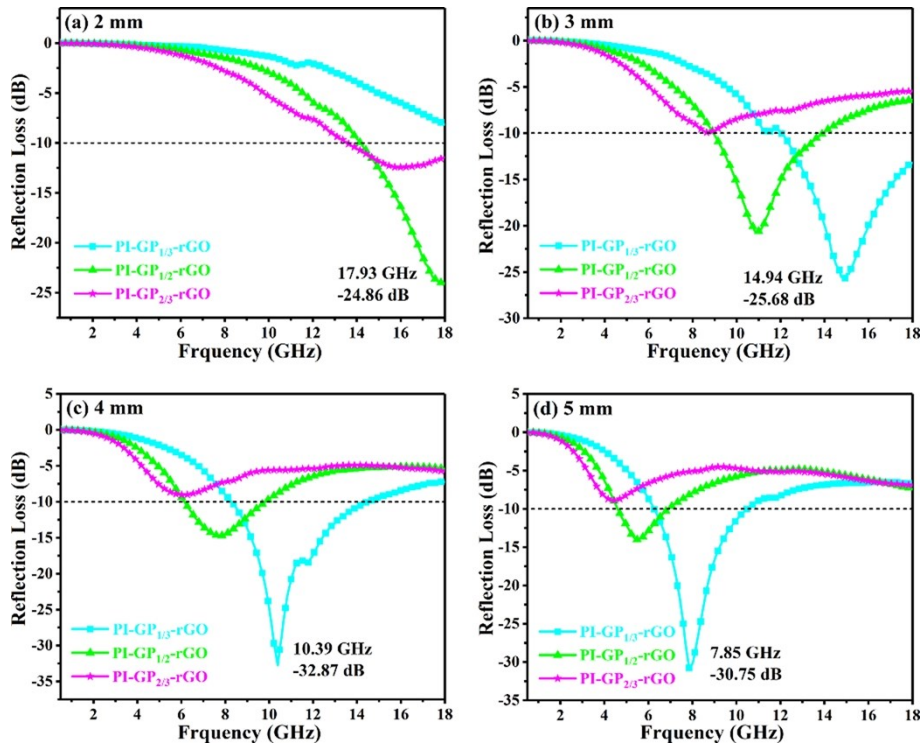

**Fig. S8** Reflection loss of PI-GP<sub>1/3</sub>-rGO, PI-GP<sub>1/2</sub>-rGO and PI-GP<sub>2/3</sub>-rGO at different thicknesses: (a) 2 mm; (b) 3 mm; (c) 4 mm; (d) 5 mm.

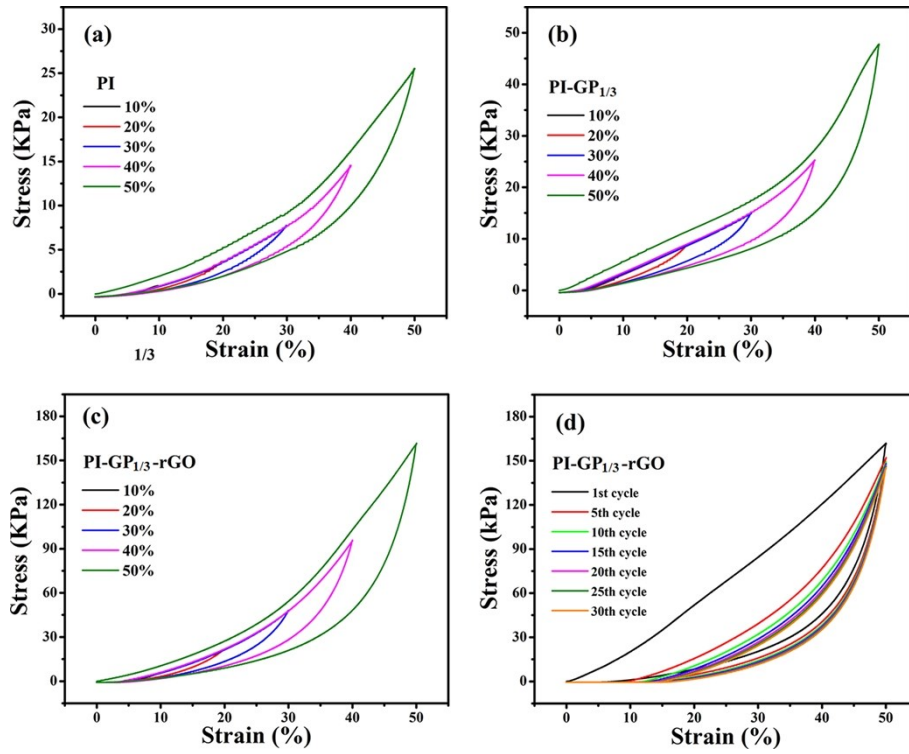

**Fig S9.** Compressive stress-strain curve (a: PI; b: PI-GP<sub>1/3</sub>; c: PI-GP<sub>1/3</sub>-rGO) and compressive cyclic test (d) of polyimide-based graphene composite foams with different hierarchical structures.
